# Supplementary material for: The fission yeast Stn1-Ten1 complex limits telomerase activity via its SUMO-interacting motif and promotes telomeres replication
Source: PubMed Central journal article supplement — Sci Adv. 2018 May 16;4(5):eaar2740. doi: 10.1126/sciadv.aar2740 (PMC5955624; doi:10.1126/sciadv.aar2740), 2018-05-16
Supplement: aar2740_SM.pdf [file aar2740_SM.pdf]

## Supplementary Materials for

### **The fission yeast Stn1-Ten1 complex limits telomerase activity via its SUMO-interacting motif and promotes telomeres replication**

Samah Matmati, Mélina Vaurs, José M. Escandell, Laetitia Maestroni, Toru M. Nakamura, Miguel G. Ferreira, Vincent Géli, Stéphane Coulon

Published 16 May 2018, *Sci. Adv.* **4**, eaar2740 (2018)  
DOI: 10.1126/sciadv.aar2740

#### **This PDF file includes:**

- table S1. Fission yeast strains used in this study.
- table S2. Plasmids used in this study.
- fig. S1. Comparison of Stn1-226 with other Stn1 mutants.
- fig. S2. Deletion of *rif1*<sup>+</sup> and *exo1*<sup>+</sup> restores viability of *stn1-226* allele.

**table S1. Fission yeast strains used in this study.**

| Figure | Strain no.                  | Genotype <sup>§</sup>                                                     | Source                        |
|--------|-----------------------------|---------------------------------------------------------------------------|-------------------------------|
| 1D     | SC651                       | <i>h<sup>+</sup> cdc25-22 ts</i>                                          | S. Forsburg                   |
|        | WT                          | <i>h<sup>-</sup></i>                                                      | P. Russell                    |
|        | SC1124-25                   | <i>h<sup>-</sup> stn1-226</i>                                             | This study                    |
| 1E     | WT                          | <i>h<sup>-</sup></i>                                                      | P. Russell                    |
|        | SC1124                      | <i>h<sup>-</sup> stn1-226</i>                                             | This study                    |
|        | YTC6733 <sup>(SC408)</sup>  | <i>h<sup>-</sup> stn1::13myc-kanMX6 his3-D1</i>                           | T. Nakamura                   |
|        | SM1174                      | <i>h<sup>-</sup> stn1-226::13myc-natMX6</i>                               | This study                    |
| 1F     | WT                          | <i>h<sup>-</sup></i>                                                      | P. Russell                    |
|        | TN7200                      | <i>h<sup>-</sup> ten1::5Flag-TEV-Avitag-kanMX6 his3-D1</i>                | Miyagawa <i>et al.</i> , 2015 |
|        | YTC6733 <sup>(SC408)</sup>  | <i>h<sup>-</sup> stn1::13myc-kanMX6 his3-D1</i>                           | T. Nakamura                   |
|        | SM1174                      | <i>h<sup>-</sup> stn1-226::13myc-natMX6</i>                               | This study                    |
|        | TN7503 <sup>(SC1131)</sup>  | <i>h<sup>2</sup> ten1::5Flag-TEV-Avitag-kanMX6 stn1::13myc-kanMX6</i>     | T. Nakamura                   |
|        | SM1175                      | <i>h<sup>2</sup> ten1::5Flag-TEV-Avitag-kanMX6 stn1-226::13myc-natMX6</i> | This study                    |
| 2A     | SM1174                      | <i>h<sup>-</sup> stn1-226::13myc-natMX6</i>                               | This study                    |
|        | SM1176                      | <i>h<sup>2</sup> ten1::5Flag-TEV-Avitag-kanMX6 stn1-226</i>               | This study                    |
|        | SM1177                      | <i>h<sup>2</sup> est1::V5-kanMX6 stn1-226</i>                             | This study                    |
| 2B-C   | TN12145 <sup>(SC1128)</sup> | <i>h<sup>-</sup> tpz1-K242R::hphMX6 his3-D1 ade-M210</i>                  | Miyagawa <i>et al.</i> , 2015 |
|        | SM1178                      | <i>h<sup>2</sup> tpz1-K242R::hphMX6 stn1-226</i>                          | This study                    |
| 3A-B   | WT                          | <i>h<sup>-</sup></i>                                                      | P. Russell                    |
|        | SC1124                      | <i>h<sup>-</sup> stn1-226</i>                                             | This study                    |
| 3C-E   | SC838                       | <i>h<sup>+</sup> rhp51Δ::ura4<sup>+</sup></i>                             | P. Russell                    |
|        | SM1179                      | <i>h<sup>2</sup> rhp51Δ::ura4<sup>+</sup> stn1-226</i>                    | This study                    |
| 4      | WT                          | <i>h<sup>-</sup></i>                                                      | P. Russell                    |
|        | SC1124                      | <i>h<sup>-</sup> stn1-226</i>                                             | This study                    |
| 5      | WT                          | <i>h<sup>-</sup></i>                                                      | P. Russell                    |
|        | SC1124                      | <i>h<sup>-</sup> stn1-226</i>                                             | This study                    |
| 5A     | YO 001 <sup>(SC387)</sup>   | <i>h<sup>+</sup> rpa1-D223Y</i>                                           | M. Ueno                       |
|        | SM1267                      | <i>h<sup>+</sup> rpa1-D223Y stn1-226</i>                                  | This study                    |
| 5B-C   | CF96 <sup>(SC388)</sup>     | <i>h<sup>+</sup> taz1Δ::ura4<sup>+</sup></i>                              | J. Cooper                     |
|        | SM1268                      | <i>h<sup>-</sup> taz1Δ::ura4<sup>+</sup> stn1-226</i>                     | This study                    |
| 5D     | TN3485 <sup>(SC381)</sup>   | <i>h<sup>-</sup> rif1Δ::ura4<sup>+</sup></i>                              | T. Nakamura                   |
|        | SM1269                      | <i>h<sup>2</sup> rif1Δ::ura4<sup>+</sup> stn1-226</i>                     | This study                    |
|        | BAF394 <sup>(SC1310)</sup>  | <i>h<sup>+</sup> rif1-PP1</i>                                             | A. Bianchi                    |
|        | MV1332                      | <i>h<sup>2</sup> rif1-PP1 stn1-226</i>                                    | This study                    |
| 5E     | TN3487 <sup>(SC392)</sup>   | <i>h<sup>-</sup> rap1Δ::ura4<sup>+</sup></i>                              | T. Nakamura                   |
|        | SM1331                      | <i>h<sup>2</sup> rap1Δ::ura4<sup>+</sup> stn1-226</i>                     | This study                    |
| 6A-E   | WT                          | <i>h<sup>-</sup></i>                                                      | P. Russell                    |
|        | SC1124                      | <i>h<sup>-</sup> stn1-226</i>                                             | This study                    |
|        | SC1030                      | <i>h<sup>+</sup> exo1Δ::kanMX6</i>                                        | B. Arcangioli                 |
|        | MV1309                      | <i>h<sup>-</sup> exo1Δ::kanMX6 stn1-226</i>                               | This study                    |

<sup>§</sup>All fission yeast strains are *leu1-32 ura1-D18*

**table S2. Plasmids used in this study.**

| Plasmid name       | Description                                                                 | Plasmid n°       |
|--------------------|-----------------------------------------------------------------------------|------------------|
| pSH18-34           | <i>LexA<sub>op(x8)</sub>-LacZ, URA3, amp<sup>r</sup></i>                    |                  |
| pJG4-5             | acidic activator B42, <i>TRP1</i> , <i>amp<sup>r</sup></i> , HA epitope tag |                  |
| pEG202             | <i>LexA<sub>(1-202)</sub>DNA-BD, HIS3, amp<sup>r</sup></i>                  |                  |
| pJG4-5-SUMO        | B42-Pmt3                                                                    | This study, p207 |
| pJG4-5-SUMO-Tpz1   | B42-Pmt3-Tpz1 <sup>243-420</sup>                                            | This study, p238 |
| pJG4-5-Tpz1        | B42-Tpz1                                                                    | This study, p194 |
| pJG4-5-Tpz1-K242R  | B42-Tpz1-K242R                                                              | This study, p448 |
| pJG4-5-Ten1        | B42-Ten1                                                                    | This study, p167 |
| pGAD-Ten1          | B42-Ten1                                                                    | B. Moser, p423   |
| pEG202-Ten1Stn1    | <i>LexA-Ten1<sub>Gly5</sub>Stn1</i>                                         | This study, p193 |
| pEG202-NStn1       | <i>LexA-NStn1<sub>1-156</sub></i>                                           | This study, p217 |
| pEG202-CStn1       | <i>LexA-CStn1<sub>157-325</sub></i>                                         | This study, p219 |
| pEG202-CStn1-195   | <i>LexA-CStn1-195</i> ( <sup>195</sup> AAYA <sup>198</sup> )                | This study, p242 |
| pEG202-CStn1-226   | <i>LexA-CStn1-226</i> ( <sup>226</sup> AAAA <sup>229</sup> )                | This study, p243 |
| pEG202-Stn1        | <i>LexA-Stn1</i>                                                            | This study, p162 |
| pEG202-Stn1-226    | <i>LexA-Stn1-226</i> ( <sup>226</sup> AAAA <sup>229</sup> )                 | This study, p359 |
| pREP41-Pol1        |                                                                             | T. Wang, p379    |
| pJK210-Stn1        | <i>ura4, stn1+</i>                                                          | This study, p323 |
| pJK210-Stn1-226    | <i>ura4, stn1-226</i> ( <sup>226</sup> AAAA <sup>229</sup> )                | This study, p331 |
| pTopo-Stn1-myc     | <i>stn1-13myc :KanMX6</i>                                                   | This study, p348 |
| pTopo-Stn1-195-myc | <i>stn1-195-13myc :KanMX6</i>                                               | This study, p382 |
| pTopo-Stn1-226-myc | <i>stn1-226-13myc :KanMX6</i>                                               | This study, p383 |

**Figure S1**

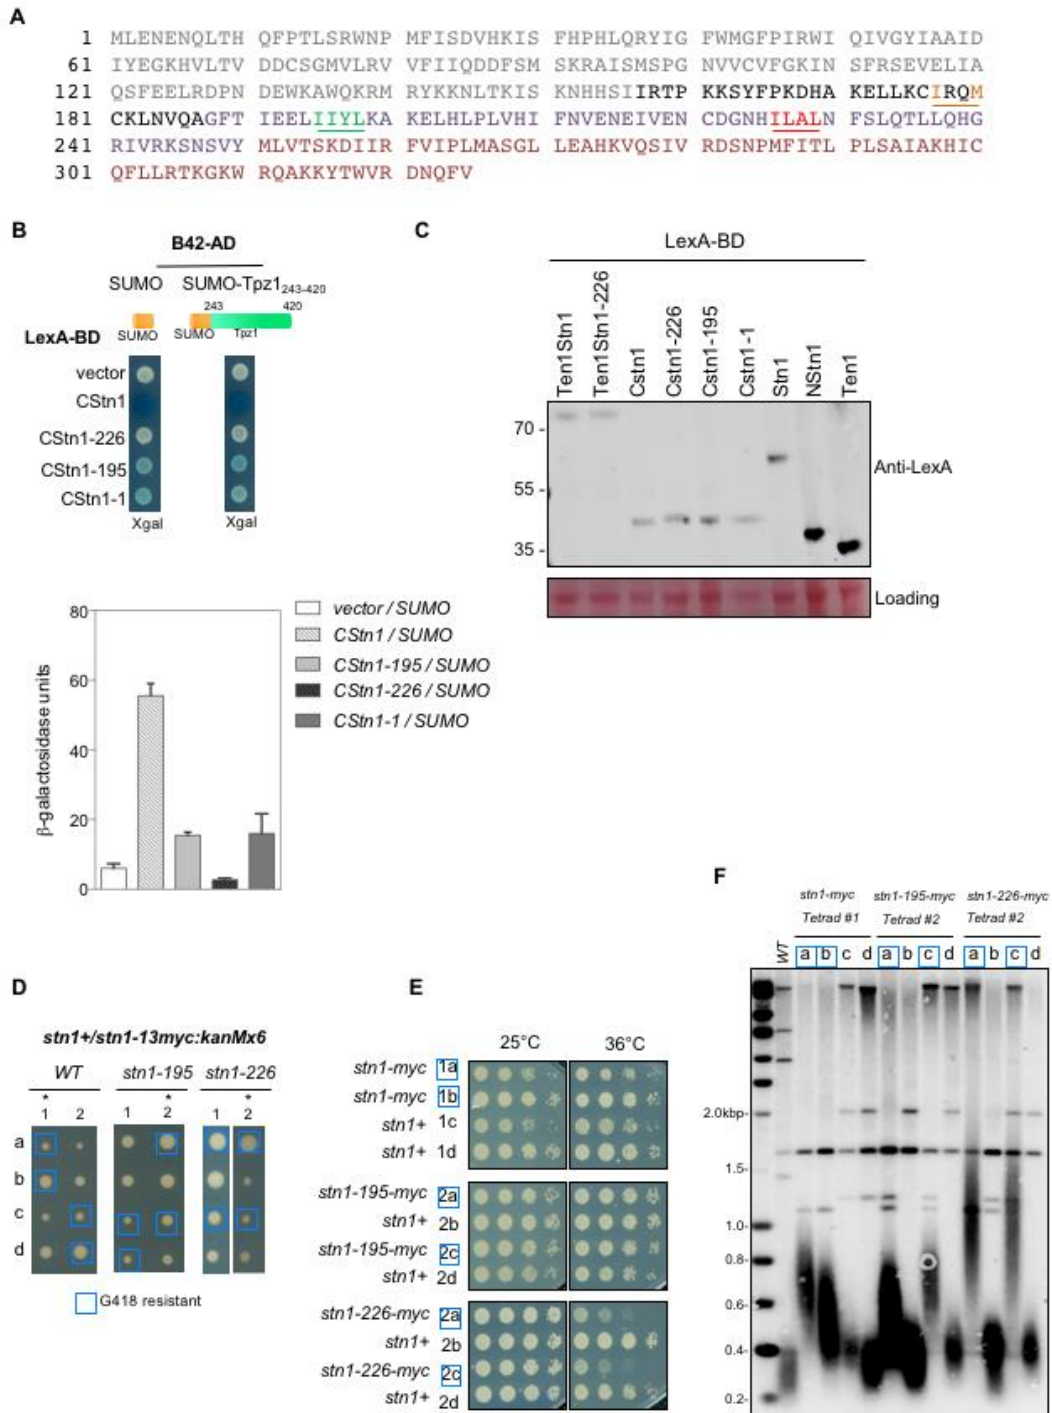

**fig. S1. Comparison of Stn1-226 with other Stn1 mutants.** (A) Fission yeast Stn1 protein sequence: N-terminal domain (1-155) in grey and the C-terminal domain (156-325), including the winged-helix-turn-helix domain (WH1, 188-251) in blue and the WH2 domain (252-325) are represented. The <sup>177</sup>IRQM, <sup>195</sup>IYYL and <sup>226</sup>ILAL that

are mutated in *stn1-1*, *stn1-195* and *stn1-226* alleles are underlined, respectively. **(B)** Interaction of Stn1 fragments with SUMO and SUMO-Tpz1 analyzed by Y2H. Y2H interaction was quantified by measurement of  $\beta$ -galactosidase activity. **(C)** Level of LexA fusion proteins used in this study (Anti LexA (N-19) antibody, Santa Cruz Biotechnology). **(D)** Tetrad dissections at 25°C of *stn1+/*stn1-myc**, *stn1+/*stn1-195-myc** and *stn1+/*stn1-226-myc** heterozygous diploid strains. Spore colonies with the indicated genotypes are shown. **(E)** Five-fold serial dilutions of the indicated cell cultures. **(F)** Telomere length analysis of the indicated spore colonies. *Apal*-digested genomic DNA was analyzed by Southern blotting with a radiolabelled telomeric probe.

**Figure S2**

**A**

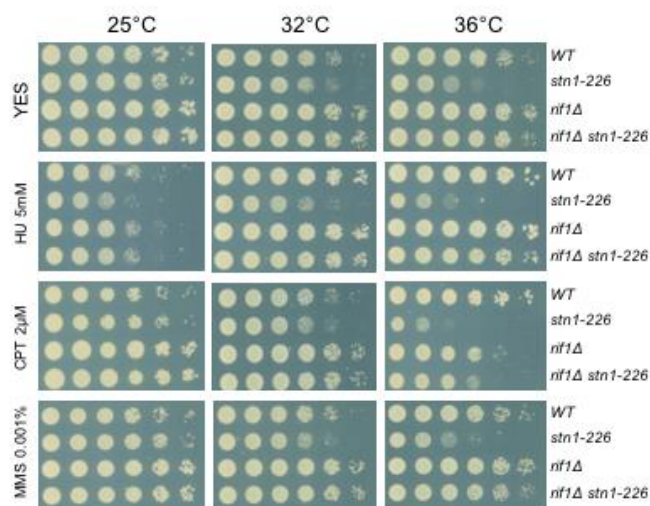

**B**

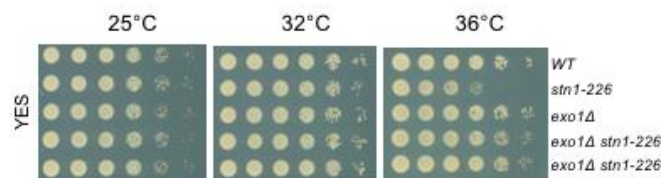

**fig. S2. Deletion of *rif1+* and *exo1+* restores viability of *stn1-226* allele. (A, B)**

Analysis of viability of the indicated strains at different temperatures. Cells were grown at 25°C, then serially diluted and plated on YES rich medium supplemented by the indicated amounts of CPT, MMS and HU.
